# Supplementary material for: How to use biologic agents in patients with rheumatoid arthritis who have comorbid disease
Source: HighWire-hosted journal article supplement (doi:10.1136/bmj.h3658), 2015-08-17
Supplement: bmj.h3658.pdf [file bmj.h3658.pdf]

## 伴有合并症的类风湿关节炎患者该如何使用生物制剂

### How to use biologic agents in patients with rheumatoid arthritis who have comorbid disease

来源:BMJ 2016;351:h3658 doi: 10.1136/bmj.h3658

#### 摘要

尽管生物性改善病情抗风湿药(bDMARDs)已很大程度地改善了类风湿关节炎(RA)患者的生活质量,但其不良反应仍然是一个问题,特别是对于那些已经有合并症的患者。RA的随机对照临床试验通常会排除有合并症的患者,并且观察时间相对较短,因此不能提供有关这类人群的不良事件资料。其他的来自国际bDMARDs注册中心的资料记录了使用bDMARDs或合成类化学物改善病情抗风湿药(csDMARDs)的患者情况,但也存在预先筛选导致的偏倚,并且虽然这些数据库记录了合并症类型,但是很少记录其严重程度。这也导致很难对这些合并症的进展或者缓解情况进行明确判断。虽然bDMARDs对于伴有某些合并症的RA患者来说并非禁忌,但仍建议对其进行充分的评估及关注。本综述总结了目前有关伴有常见合并症的RA患者的bDMARDs使用情况,为医生和其患者探讨并选择合适的bDMARDs提供了循证证据。

#### 前言

类风湿关节炎(RA)的全球患病率约为0.24%<sup>1</sup>,虽然在过去的40年间,其事件病死率每年下降2.3%,但是据估计其标准化后的病死率仍为一般人群的1.5倍<sup>2,3</sup>。最主要的死亡原因包括心血管病、肿瘤和感染<sup>4</sup>。另外,RA患者合并症的患病率高达60%<sup>5</sup>。虽然RA患者事件病死率的降低不能只归因于生物性改善病情抗风湿药(bDMARDs),但多项研究已经明确了该药

能减少致残,改善RA患者的生活质量<sup>6</sup>。但由于批准bDMARDs上市所要求的随机对照试验(RCTs)的设计方案本身就限制了伴有较多严重合并症的患者招募,这就使得人们对于伴有慢性病的患者使用这些药物的疗效和安全性产生了质疑。

同样,对于评价这些药物对合并症的影响来说,这些临床试验的持续时间可能并不足够。观察性研究及注册类研究通常采用把bDMARDs用于更年轻更健康的RA患者,而把传统的合成类化学物改善病情抗风湿药(csDMARDs)用于伴有慢性疾病的患者,因此使其结果受限。这样的方案也低估了bDMARDs对于慢性病的潜在益处,例如血清胰岛素和胰岛素:血糖指数的下降,以及使用肿瘤坏死因子 $\alpha$ (TNF- $\alpha$ )抑制剂的患者心肌梗死发病率的减少<sup>7,8</sup>。

目前RA推荐的重点在于bDMARDs的适应证,而很少讨论伴有合并症的RA患者的治疗<sup>9,10</sup>。另外也很少讨论患者参与治疗决策的情况,即便参与治疗决策可能提高患者对于临床过程的满意度<sup>11</sup>。本综述总结了伴有常见合并症的RA患者的bDMARDs使用情况,涉及伴有特定慢性感染、肿瘤、心血管疾病和其他慢性病的患者如何合理选择生物制剂的指导。另外,文章也将探讨伴有合并症但计划使用bDMARDs的RA患者的临床或实验室监测及药物调整方案。

John S Richards<sup>1,2</sup>,  
Sharon M Dowell<sup>1</sup>,  
Mercedes E  
Quinones<sup>3</sup>,  
Gail S Kerr<sup>1,2,3</sup>

<sup>1</sup>Veterans Affairs  
Medical Center,  
Washington DC  
20422, USA  
<sup>2</sup>Georgetown  
University,  
Washington, DC, USA  
<sup>3</sup>Howard University,  
Washington, DC, USA

Correspondence to:  
J S Richards  
john.richards1@va.  
gov

刘小虎 译  
王一雯  
黄烽 校  
解放军总医院  
风湿科

## 来源与选择标准

我们的资料主要来源于PubMed和Cochrane数据库,我们从中检索了从1997年至2014年8月间开始使用bDMARDs的RA患者的资料。我们分析了TNF- $\alpha$ 抑制剂(依那西普、阿达木单抗、英夫利西单抗、赛妥珠单抗和戈利木单抗)、阿巴西普、利妥昔单抗和托珠单抗。合并症包括心血管病、肿瘤、感染、间质性肺病、慢性阻塞性肺疾病(COPD)、慢性肾损伤、糖尿病和妊娠。检索词包括“rheumatoid arthritis”和“comorbid diseases”。共确定了超过2500篇的英文文章,其中,我们复习了所有的临床试验、荟萃(meta)分析、前瞻性和回顾性病例系列研究、临床注册研究以及病例报道( $n=500$ )。我们优先选择了报道伴以上合并症的患者在使用bDMARDs后的安全性及并发症资料的研究,特别是有长期随访的研究。考虑到本文的重点,最主要的资料来源是meta分析和国际注册的研究。当无其他研究资料时则选用病例报道。通过回顾已发表的学会及国际上的bDMARDs治疗RA的指南,对该文章进行了相应补充。与3位RA患者讨论,并获得他们对于该文章中提到的合并症情况的认可。另外,他们建议在决定是否选用bDMARDs时,应将生活质量作为参考因素。

### 患者如何参与本文创作

患者希望了解更多的生物性改善病情抗风湿药(bDMARDs)在伴有合并症的情况下,对于他们生活质量的影响,因此要求他们复习了文稿,并对如下问题发表意见:

- 哪些合并症是最重要的? 患者同意所选的合并症
- 了解信息之后,你是否同意有关使用bDMARDs的推荐? 这些推荐是:
  - 应关注间质性肺病患者的bDMARDs使用情况
  - 依那西普对于丙型肝炎患者似乎是一个好的选择
  - 可以接受糖尿病或慢性阻塞性肺疾病病情出现可治且可逆性的暂时性加重
  - 由于心血管疾病和妊娠患者使用bDMARDs的可用资料不足,因此需知情同意后再做出决定

## 感染和疫苗接种

bDMARDs的靶细胞是宿主抵御微生物病原体

不可或缺的部分,他们本身就被认为是严重感染的危险因素。随着TNF- $\alpha$ 抑制剂的广泛使用,潜伏性结核的复发以及严重的真菌感染已经成为严重的威胁。慢性病毒如艾滋病病毒(HIV)、乙型肝炎病毒(HBV)以及丙型肝炎病毒(HCV)感染的患者也处于病毒再激活以及病情进展的危险之中。

### HBV

TNF- $\alpha$ 水平在慢性HBV患者体内是升高的,它似乎对于病毒的清除和控制病毒的复制起着重要的作用。HBV的再激活最初报道于接受化疗、TNF- $\alpha$ 抑制剂和利妥昔单抗的乙型肝炎表面抗原(HBsAg)阳性的患者,后续报道于HBsAg阴性、核心抗体(HBcAb)阳性的患者。

英夫利西单抗、依那西普和阿达木单抗都可能影响到HBV的再激活<sup>12-14</sup>。在开始生物制剂治疗之前,常规筛查HBV以及对于高危患者预防性抗病毒治疗等措施,已经减少了报道病例的数量,而目前尚缺乏新的TNF- $\alpha$ 抑制剂和其他生物制剂的相关资料。

利妥昔单抗,不论是单用,还是作为联合化疗的一部分,都可以降低乙型肝炎表面抗体(HBsAb)的滴度,HBsAg阳性患者的病毒再激活率为3.4%~80%,HBsAg阴性而HBcAb阳性的患者再激活率为1.5%~23.8%,有时会出现致死性的后果<sup>15-20</sup>。对于HBsAg阳性的患者来说,预防性抗病毒治疗是明智而慎重的选择。一项回顾性研究显示,在接受阿巴西普的8例HBsAg阳性RA患者中,只有未经HBV预防性治疗的患者出现了病毒再激活<sup>21</sup>。

另有文献报道一例HBsAg阴性而HBcAb阳性的患者,在接受阿巴西普后出现HBV再激活<sup>22</sup>。托珠单抗引起HBV再激活的资料较少,但有关于2例接受HBV预防治疗的患者以及1例HBsAg阳性但未接受抗病毒预防治疗的患者在使用妥珠单抗后未出现HBV再激活的病例报道<sup>23-25</sup>。

最近的一项研究发现,179例HBsAg阴性而HBcAb阳性的患者,未曾行抗病毒预防治疗而接受各种bDMARDs(包括利妥昔单抗),随访2~5年,没有病例出现血清学转换,提示这些患者HBV再激活的风险较低<sup>26</sup>。

因为耐受性好、价格低廉,拉米夫定成为最常用的抗病毒药,但是治疗5年后,有近70%的病例出现耐药,从而限制了它的广泛使用<sup>27</sup>。其他的抗

病毒药如恩替卡韦则更为成功,它可显著降低再激活率(与拉米夫定比:6.3%比39.3%; $P<0.05$ )<sup>16,28</sup>。

推荐(表1)

2012年更新的推荐中,美国风湿病学会(ACR)建议对于慢性未经治疗的HBV或经过治疗但伴有肝功能不全(Child-Pugh B级或更高级)的患者不使用bDMARDs,但对于那些仅是既往感染过HBV的患者则未作推荐<sup>29</sup>。

更早些的关于HBV预防性治疗的共识指南主要是基于肿瘤科的数据。2015年,美国胃肠病学学会(AGA)将免疫抑制疗法分为高危(HBV再激活的机会>10%,最明显的为利妥昔单抗)、中危(1%~10%,所有其他bDMARDs)和低危(<1%,csDMARDs)<sup>30,39</sup>。

推荐在开始使用bDMARDs治疗之前,常规筛查HBsAg和HBcAb。HBsAg阳性的患者,应检测并记录HBV病毒的载量,如果使用中或高危bDMARD,在治疗之前一周应开始抗病毒治疗。抗病毒治疗的疗程应该持续至终止bDMARDs后3~6个月<sup>31-33</sup>。欧洲肝脏研究学会(EASL)推荐,使用具

有更好的抗病毒效能且病毒耐药性较低的恩替卡韦或替诺福韦,而非拉米夫定<sup>38</sup>。对于HBsAg阴性及HBcAb阳性的患者,应该检测HBV病毒载量,如果能检测出,这些患者应该等同于HBsAg阳性的患者一样治疗。

对于HBsAg阴性而HBcAb阳性但未检测出HBV DNA的患者,是否使用抗病毒预防治疗一直存在争议。目前EASL和AGA都推荐,对于使用高风险的bDMARD利妥昔单抗治疗的患者,应当进行预防性治疗,虽然该推荐等级比较低<sup>30,38</sup>。

他们也推荐对于中等风险的bDMARDs也采用这种方法,虽然推荐等级不强,且只有中等的循证医学证据。对于接受具有中等风险bDMARDs治疗的患者,进行病毒再活化的监测被认为是比预防性治疗更合理的方法,但应该和患者进行充分沟通<sup>40</sup>。连续的监测项目包括肝功能、HBsAg血清转换以及HBV病毒载量<sup>30,38</sup>。

### HCV

在慢性HCV感染的患者体内,TNF- $\alpha$ 水平是升

表1 类风湿关节炎(RA)伴感染的患者使用生物性改善病情抗风湿药(bDMARDs)的推荐\*

| 推荐                                                                                                                         | 证据等级 <sup>†</sup>                     |
|----------------------------------------------------------------------------------------------------------------------------|---------------------------------------|
| <b>乙型肝炎(HBV)</b>                                                                                                           |                                       |
| 开始使用TNF- $\alpha$ 抑制剂和利妥昔单抗治疗之前筛查HBV(EMA)                                                                                  | IV                                    |
| 未经治疗的慢性HBV或经过治疗但肝功能不全(Child-Pugh B级或更高级)的患者不使用bDMARDs(ACR,EMA) <sup>12-14</sup>                                            | III                                   |
| 使用TNF- $\alpha$ 抑制剂、阿巴西普或利妥昔单抗治疗HBsAg阳性的患者时,需在治疗前1周开始预防性抗病毒治疗,持续至治疗后3~6个月,抗病毒药物包括恩替卡韦、替诺福韦或阿德福韦酯 <sup>16,21,28,30,31</sup> | III                                   |
| HBsAg阴性/HbcAb阳性的患者使用TNF- $\alpha$ 抑制剂和利妥昔单抗,需预防性抗病毒治疗 <sup>31-33</sup>                                                     | III                                   |
| <b>丙型肝炎(HCV)</b>                                                                                                           |                                       |
| 开始使用TNF- $\alpha$ 抑制剂和利妥昔单抗治疗之前筛查HCV(基于当地的患病率;AR)                                                                          |                                       |
| 依那西普可用于HCV患者(ACR) <sup>34</sup>                                                                                            | II                                    |
| 未经治疗的慢性HCV或经过治疗但肝功能不全(Child-Pugh B级或更高级)的患者不使用bDMARDs(AR)                                                                  | IV                                    |
| <b>结核</b>                                                                                                                  |                                       |
| 开始bDMARDs治疗前进行TST或IGRA测定,筛查潜伏性结核(ACR,EMA,CRA) <sup>35</sup>                                                                | II (TNF- $\alpha$ 抑制剂)IV (利妥昔单抗,阿巴西普) |
| TST或IGRA试验阳性可复测或检查胸片,基于国际/地区性指南(EMA)                                                                                       | IV                                    |
| 开始bDMARDs治疗前,至少要完成1个月的预防性抗潜伏性结核治疗                                                                                          | III                                   |
| 如果预防性抗结核治疗有禁忌证及对于来自流行区域的患者,利妥昔单抗可以作为一线bDMARD(EULAR) <sup>9</sup>                                                           | IV                                    |
| <b>艾滋病</b>                                                                                                                 |                                       |
| 开始bDMARDs治疗之前,需根据危险因素和国际指南进行艾滋病病毒(HIV)筛查(AR)                                                                               | IV                                    |
| CD4细胞计数>200 $\times$ 10 <sup>6</sup> /L的HIV患者,可考虑使用TNF- $\alpha$ 抑制剂(AR) <sup>36,37</sup>                                  | III                                   |

注: \*缩写词: AR:作者的推荐; ACR:2012年更新的美国风湿病学会推荐; CRA:加拿大风湿病学会关于RA药物治疗的推荐; EMA:欧洲药物管理局批准的产品特点的总结; EULAR:欧洲抗风湿病联盟; IGRA: $\gamma$ 干扰素释放试验; HbsAg:乙型肝炎表面抗原; HbcAg:乙型肝炎核心抗体; TNF- $\alpha$ :肿瘤坏死因子 $\alpha$ ; TST:结核菌素皮试

<sup>†</sup>证据等级: I:荟萃(meta)分析、随机对照试验(RCTs)的系统性综述,或单项的RCTs; II:观察性研究的meta分析和系统性综述、病例对照研究; III:病例系列报道、病例报道; IV:专家意见



高的,它对于病毒耐药起着重要作用。在一项针对既往没有接受抗病毒治疗的HCV患者的小样本RCT研究中,依那西普能显著增强患者对于干扰素 $\alpha$ 2b和利巴韦林的反应,有63%的接受依那西普治疗的患者HCV RNA得以清除,而安慰剂组清除率仅为32%( $P=0.04$ )<sup>41</sup>。有些病例报道记录了HCV阳性的患者安全有效地使用了TNF- $\alpha$ 抑制剂,但是以利妥昔单抗为基础的化疗却和HCV再激活的风险增高有关<sup>31,42-44</sup>。

B细胞清除可能导致IgG水平降低、病毒复制或破坏的B细胞释放出病毒颗粒。使用利妥昔单抗后,细胞介导的肝细胞坏死可能随着免疫重建而发生<sup>44-46</sup>。然而,利妥昔单抗成功地治疗了HCV冷球蛋白血症性血管炎,因此对于合并有HCV的风湿性疾病患者来说,利妥昔单抗被认为是安全的,仅出现过一例RA患者肝炎复发的报道<sup>47-49</sup>。

有关阿巴西普和RA合并慢性HCV的资料有限,但是曾报道在2例患者中出现HCV病毒载量的轻微波动<sup>50</sup>。托珠单抗用于HCV患者的报道也很少,因此相关信息也很缺乏<sup>51,52</sup>。有一篇记录因HCV病毒载量和转氨酶增加而终止使用托珠单抗治疗的报道<sup>53</sup>。然而,鉴于白介素-6对于肝细胞再生和增殖具有潜在的保护作用,以及其水平在慢性HCV、肝硬化和肝细胞癌中增高,因此我们需要积累更多的、长期的有关托珠单抗资料<sup>52,54</sup>。

#### 推荐(表1)

RA患者在开始bDMARDs治疗之前应该筛查慢性HCV。基于上述证据,TNF- $\alpha$ 抑制剂是一种可行的治疗选择,文献数据支持依那西普的应用。在治疗过程中需要监测,可能需要行基线期肝活检、密切监测肝酶以及HCV病毒载量,因此肝病科医生应该参与该过程。ACR推荐依那西普可用于慢性HCV患者<sup>29</sup>。对于急性或慢性HCV伴有严重肝损害(Child-Pugh分级B或C)的患者,则应避免使用生物制剂<sup>29</sup>。

#### 戊型肝炎病毒(HEV)

HEV感染通常为自限性和急性肝炎,很少发展为慢性HEV感染,但也可能导致爆发性肝炎,迅速进展为肝硬化,而这几乎仅见于由于器官移植、血液病肿瘤以及HIV感染的免疫抑制状态的患者<sup>55</sup>。法国有2篇报道显示使用bDMARDs的患者出现了HEV感染<sup>56,57</sup>。

#### 推荐

目前没有指南提出需在bDMARDs开始治疗之前筛查HEV,但是当患者出现难以解释的转氨酶升高时,风湿科医生应警惕该病可能。

#### 结核

RA患者结核病复发的风险是增加的,一篇报道显示与没有RA的患者相比,相对风险为2。其中,使用TNF- $\alpha$ 抑制剂的患者的结核复发风险似乎最高,据报道为118/100 000人年,是未用这些药物的RA患者的4倍<sup>35</sup>。

最常见的表现为肺结核,但肺外结核也有报道,当评估患者病情时应当考虑到这点<sup>35,58</sup>。

TNF- $\alpha$ 抑制剂也与非结核分枝杆菌感染的发病率升高有关<sup>59</sup>。结核复发的风险在使用英夫利西单抗时最高(145/100 000人年),而使用依那西普时最低(80/100 000人年)<sup>35,60</sup>。利妥昔单抗和阿巴西普导致结核复发的报道很少,利妥昔单抗被认为更安全些<sup>61-64</sup>。对全部托珠单抗的临床试验进行回顾后仅发现8例结核复发的病例<sup>65</sup>。

#### 推荐(表1)

ACR推荐在开始使用任何bDMARDs之前,需要筛查潜伏的结核感染<sup>29</sup>。欧洲抗风湿病联盟(EULAR)共识提示,没有足够的资料推荐在使用利妥昔单抗之前必须进行结核的筛查,但是建议当存在严重的机会性感染时,不使用利妥昔单抗<sup>66</sup>,然而又推荐对于预防性抗结核治疗有禁忌证或来自流行区域的患者<sup>9</sup>,利妥昔单抗可以作为一线bDMARD。按照地区性的指南,在开始使用bDMARDs前,RA患者应该进行潜伏的结核感染的筛查,或者是结核菌素皮试(TST),或者是 $\gamma$ 干扰素释放分析(IGRA),其中IGRA被推荐用于接受过卡介苗接种的患者。TST之后应当有一段时间的间隔期,再进行IGRA检测。

专家们在何种检测更优这一问题上并未达成一致,但是对于免疫缺陷的患者来说,这两种检测方法均可<sup>67</sup>。应根据这些检测的使用情况以及对结果的解释制定地区性指南。阳性结果(TST或IGRA)的患者应该进行胸片检查排除活动性结核病;如果胸片未发现异常,应在开始bDMARD治疗前1个月开始潜伏性结核感染的预防性治疗<sup>29</sup>。然而对于非暴露或非高危人群进行一系列结核筛查的价值尚不清楚<sup>67</sup>。所有的TNF- $\alpha$ 抑制剂都可能和

结核复发有关,最安全的是利妥昔单抗。

## HIV

免疫抑制治疗可能会进一步增加免疫功能缺陷患者的感染风险。已证实TNF- $\alpha$ 参与HIV感染的发病和进展过程,因此理论上TNF- $\alpha$ 抑制剂促进HIV病情进展的可能性很小。临床上TNF- $\alpha$ 抑制剂已被安全地用于CD4细胞计数稳定于 $200 \times 10^6/L$ 以上的HIV患者。有一篇报道细胞计数较低的患者在治疗后出现反复的多重微生物感染<sup>36,68</sup>。利妥昔单抗似乎不增加伴有HIV的淋巴瘤患者机会性感染的风险<sup>37</sup>。目前,合并HIV的患者使用其他bDMARDs的资料较少。

### 推荐(表1)

我们推荐RA患者开始bDMARDs治疗之前应该筛查HIV,基于上文提到的证据,TNF- $\alpha$ 抑制剂对于CD4细胞计数稳定或高于 $200 \times 10^6/L$ 的HIV患者可能是安全的。低CD4细胞计数、高病毒载量及同时进行免疫抑制治疗的患者使用TNF- $\alpha$ 抑制剂的长期安全性尚不清楚。

## 免疫接种

在使用bDMARDs治疗期间进行灭活疫苗的接种被认为是安全的,但可能导致免疫反应变弱。TNF- $\alpha$ 抑制剂可能不会影响肺炎球菌和流感疫苗的体液免疫反应,但是接受利妥昔单抗患者的两种疫苗血清转换率都较低<sup>69</sup>。利妥昔单抗不影响之前流感疫苗接种产生的抗体的水平,表明疫苗可顺利接种,正如每次EULAR推荐指南中提到的,接种疫苗的最理想间隔时间为4周<sup>70-72</sup>。在利妥昔单抗治疗24周后接种破伤风毒素是有效的,没有资料证明24周内是否有效,因此对于有高度风险感染破伤风的患者建议在这个期间进行被动免疫<sup>72,73</sup>。阿巴西普和托珠单抗不会明显削弱对于破伤风和肺炎的免疫接种效果<sup>74-77</sup>。

### 推荐

我们推荐RA患者应该根据本国的指南进行疫苗接种,在bDMARDs治疗之前合理地接种所有符合指征的疫苗。医生应该清楚接种的有效性可能会因为接受bDMARDs治疗而减弱,特别是接受利妥昔单抗治疗的患者,流感疫苗和肺炎球菌疫苗受到的影响会更大。对于正接受bDMARDs治疗的人群,接种活疫苗(麻疹-腮腺炎-风疹、水痘疱疹、黄

热病及口服脊髓灰质炎疫苗)是禁忌的,如需接种应该在开始治疗之前至少4周进行<sup>78</sup>。

## 心血管疾病

除了常见的危险因素,RA的炎症也会增加心血管疾病(粥样硬化、脑血管病、冠状动脉疾病、心力衰竭和心肌梗死)的患病风险和病死率。然而,业已存在心血管疾病,特别是心力衰竭的RA患者使用bDMARDs仍有争议。风湿科医生的难点在于如何平衡疗效及风险,既控制RA的疾病活动,又相应地减少心血管疾病的风险,而不是增加新发心力衰竭或者是心力衰竭恶化的风险。

### TNF- $\alpha$ 抑制剂和csDMARDs

德国临床注册数据显示TNF- $\alpha$ 抑制剂和csDMARDs相比,新发心力衰竭及心力衰竭加重的风险并无显著增加(调整的危害比为1.66,0.67~4.10, $P=0.28$ )。然而,这些分析的结果有以下不足:没有明确定义结果、高脱落率及心血管事件样本数太小<sup>79,80</sup>。

与前述研究不同,有一项用来评价英夫利西单抗治疗心力衰竭有效性的RCT研究,入组了纽约心脏学会(NYHA)分级III~IV级心力衰竭(ATTACH)的患者。150例患者在第0、2和6周分别接受安慰剂、英夫利西单抗5 mg/kg,或英夫利西单抗10 mg/kg静脉输注。主要评价指标为第14周时预定的临床状况,次要评价指标包括28周时的射血分数及临床状况的变化。14周时每一治疗组的临床状况均无改善,但在28周时10 mg/kg英夫利西单抗组显示出更高病死率的趋势(与安慰剂组比较为13%比5%)<sup>81</sup>。同样的结果也见于依那西普对于II~IV级心力衰竭患者的影响<sup>82</sup>。这些结果提示伴有NYHA III~IV级心力衰竭的RA患者禁忌使用这类制剂,伴有NYHA II级心力衰竭的患者应谨慎推荐<sup>83</sup>。2012年ACR指南不推荐TNF- $\alpha$ 抑制剂用于NYHA III~IV级且射血分数小于50%的患者。并未推荐对于无心力衰竭病史的患者在TNF- $\alpha$ 抑制剂治疗之前做基线的超声心动图筛查<sup>84</sup>。

来自于英国风湿病学会生物制剂注册中心(BSRBR)的前瞻性报道显示,与使用csDMARDs治疗的RA患者相比,使用TNF- $\alpha$ 抑制剂的RA患者首次发生心肌梗死的发病率比为1.44(0.56~3.67)。然而,与“无应答者”相比,TNF- $\alpha$ 抑制剂“应答者”(6个月内应答)的发生率比为0.36(0.19~



0.69),表明那些TNF- $\alpha$ 抑制剂早期应答者心肌梗死的发病率较低<sup>7</sup>。

一项英国的回顾性研究显示,使用TNF- $\alpha$ 抑制剂的RA患者的急性冠状动脉事件(定义为冠状动脉血管重建、心肌梗死或不稳定心绞痛)发生率(风险比为0.45, 0.21~0.96)比使用csDMARD(除外甲氨蝶呤)的患者低55%。这在那些没有糖尿病及类风湿因子阳性的人群中最为明显<sup>85</sup>。除了一例输注英夫利西单抗后出现急性冠状动脉综合征的病例报道以外,目前的资料表明TNF- $\alpha$ 抑制剂对于有冠状动脉疾病或心肌梗死病史的RA患者来说并非禁忌<sup>86</sup>。

#### 非TNF- $\alpha$ 抑制剂

关于非TNF- $\alpha$ 抑制剂的bDMARDs用于伴有心血管疾病的患者的资料多为散发报道。托珠单抗与平均总胆固醇、高密度脂蛋白和甘油三酯可逆性中度升高相关,虽然目前发现致动脉粥样硬化脂质升高,但与使用其他药物治疗的RA患者相比,使用上述药物的患者心血管事件并未增多<sup>65,87</sup>。

2015年发表的一篇系统性综述总结了用bDMARDs治疗的慢性炎性关节病患者血脂谱的变化,发现用托珠单抗治疗的RA患者更可能出现高胆固醇血症(优势比为4.64, 2.71~7.95)、高密度脂蛋白升高(2.25, 1.14~4.44)以及低密度脂蛋白升高(4.80, 3.27~7.05)。使用TNF- $\alpha$ 抑制剂的患者并未出现此种情况(1.54, 0.90~2.66)<sup>88</sup>。

药品说明书推荐,开始托珠单抗治疗后4~8周内应检测血脂水平,以后间隔24周检测,血脂出现异常时推荐按照目前的降血脂指南[美国国家胆固醇教育计划第3次成人委员会指南(ATP III NCEP指南)]进行治疗。在TOWARD研究中,16例血脂升高的患者开始他汀类治疗,均有效地降低或稳定了胆固醇水平<sup>89</sup>。

总结了5项III期临床试验的一篇综述显示,对于那些基线期就用他汀治疗的患者,托珠单抗诱导的平均低密度脂蛋白水平升高并不明显,开始托珠单抗治疗后就启动他汀类治疗可将低密度脂蛋白减少至基线值以下<sup>90</sup>。

利用妥昔单抗治疗淋巴瘤的研究显示,很少病例(<0.1%)出现急性冠状动脉综合征,包括急性心肌梗死,虽然有8%的患者出现心律失常<sup>91,92</sup>。

一项汇总的观察性病例研究的安全性资料分析显示,使用妥昔单抗治疗的RA患者心脏事件也不常见,心肌梗死发生率与使用csDMARD治疗

的患者相似<sup>93</sup>。心肌梗死是最严重的心脏事件,患者有至少一项传统的心血管疾病的危险因素。NYHA IV级心力衰竭或未得到控制的冠状动脉疾病的患者禁忌使用妥昔单抗<sup>94</sup>。在阿巴西普治疗中出现的心血管事件也不常见,稳定的心血管疾病并非治疗禁忌<sup>95</sup>。

#### 推荐(表2)

没有心力衰竭病史的RA患者并不需要在使用TNF- $\alpha$ 抑制剂之前进行基线期多普勒心动超声的筛查<sup>83</sup>。EULAR推荐有较高心血管疾病风险的患者,首先要合理控制所有常见的心血管疾病危险因素,同时控制RA病情<sup>108</sup>。既往有心肌梗死但无心力衰竭的患者,可以在监测心功能的情况下给予TNF- $\alpha$ 抑制剂治疗。NYHA III~IV级的患者禁忌使用TNF- $\alpha$ 抑制剂,对于轻度心力衰竭的患者推荐谨慎使用<sup>83</sup>。既往有脑血管疾病史并非使用bDMARDs的禁忌。

#### 肿瘤

与RA和肿瘤不同,bDMARDs和肿瘤的相关性非常复杂。丹麦的数据显示,RA患者非霍奇金淋巴瘤(2.4, 1.9~2.9)、霍奇金淋巴瘤(3.4, 1.8~5.6)、肺癌(1.5, 1.3~1.7)以及非黑色素瘤皮肤癌(1.3, 1.1~1.4)的相对风险增加,而乳腺癌(0.8, 0.7~0.9)和结肠直肠癌(0.8, 0.7~0.9)的风险降低<sup>109</sup>。吸烟和非甾体消炎镇痛药(NSAIDs)等混杂因素可分别解释肺癌和结肠直肠癌的反常结果,而RA病情的活动与淋巴瘤的发生是相关的<sup>110</sup>。

生物制剂调节免疫系统,可能抑制肿瘤或影响它的发展。虽然某些肿瘤会产生TNF- $\alpha$ 并可反向刺激肿瘤细胞,但高剂量的TNF- $\alpha$ 会诱导肿瘤的坏死。TNF- $\alpha$ 参与了CD8<sup>+</sup>T细胞和自然杀伤细胞在攻击免疫原性肿瘤细胞时的细胞毒效应<sup>111</sup>。同样的,妥昔单抗已用于治疗B细胞淋巴瘤,托珠单抗用于治疗Castleman病<sup>112,113</sup>。

#### RCT数据

bDMARDs治疗RA的RCT试验未纳入肿瘤患者,然而在使用这些药物和使用安慰剂的患者之间,肿瘤的发生率还是有显著的差别。一篇包含有9项RCT研究的meta分析,分别纳入3493例使用英夫利西单抗和1512例使用阿达木单抗的患者,结果显示使用TNF- $\alpha$ 抑制剂的患者中有29例肿瘤报道,而安慰剂组仅有3例[合并优势比为3.3(1.2~9.1)]<sup>114</sup>。

肿瘤与较高剂量TNF- $\alpha$ 抑制剂相关,而与低剂

表2 伴有特定合并症的类风湿关节炎(RA)患者使用生物性改善病情抗风湿药(bDMARDs)的推荐<sup>a</sup>

| 推荐                                                                  | 证据等级 <sup>b</sup> |
|---------------------------------------------------------------------|-------------------|
| <b>心血管疾病</b>                                                        |                   |
| 优化对于常见的心血管疾病危险因素的管理 (AR)                                            | IV                |
| 使用TNF- $\alpha$ 的患者需临床监测心力衰竭的症状 (EMA) <sup>85</sup>                 | IV                |
| III 或 IV级心力衰竭患者禁忌使用TNF- $\alpha$ 抑制剂 (ACR, CRA, EMA) <sup>82</sup>  | I                 |
| IV 级心力衰竭患者禁忌使用利妥昔单抗(EMA) <sup>86</sup>                              | IV                |
| <b>肿瘤</b>                                                           |                   |
| 如果以前没有检查,需根据每个国家的指南进行年龄相关的肿瘤筛查 (AR)                                 | IV                |
| 正在接受化疗或放疗的活动性肿瘤患者停止或延迟使用bDMARDs(CRA)                                | IV                |
| TNF- $\alpha$ 抑制剂不推荐或可谨慎用于已经治疗的淋巴瘤患者(CRA, ACR) <sup>97</sup>        | III               |
| 已经治疗的淋巴瘤患者可考虑使用利妥昔单抗(CRA, ACR)                                      | IV                |
| 对于实体瘤的治疗已超过5年的患者,可以接受bDMARD治疗(ACR)或谨慎应用该类药物 (CRA) <sup>98-100</sup> | II                |
| <b>间质性肺病</b>                                                        |                   |
| 患者在开始使用bDMARDs治疗之前应该进行PFT和DLCO检测,并咨询呼吸科医生 <sup>101</sup>            | IV                |
| <b>慢性阻塞性肺疾病 (COPD)</b>                                              |                   |
| 推荐使用TNF- $\alpha$ 抑制剂 <sup>102</sup>                                | II                |
| 有症状的患者避免使用阿巴西普 <sup>103</sup>                                       | II                |
| <b>糖尿病</b>                                                          |                   |
| 推荐使用bDMARDs <sup>104,105</sup>                                      | II                |
| 脆性糖尿病患者开始使用TNF- $\alpha$ 抑制剂时,应监测低血糖的发生 <sup>106</sup>              | III               |
| <b>妊娠</b>                                                           |                   |
| 妊娠期间不推荐使用bDMARDs (EMA)                                              | IV                |
| 由于缺乏循证医学的证据,推荐计划怀孕患者、产科医生和风湿科医生共同讨论 <sup>107</sup>                  | III               |

注: 缩略词: AR:作者的推荐; ACR:2012年更新的美国风湿病学会推荐; CRA:加拿大风湿病学会关于RA药物治疗的推荐; DLCO:一氧化碳肺弥散功能; EMA:欧洲药物管理局批准的产品特点的总结; EULAR:欧洲抗风湿病联盟; PFT:肺功能测定; TNF- $\alpha$ :肿瘤坏死因子 $\alpha$

<sup>a</sup>证据等级: I:荟萃(meta)分析、随机对照试验(RCTs)的系统性综述或个体RCTs; II:观察性研究的meta分析和系统性综述、病例对照研究; III:病例系列报道、病例报道; IV:专家意见

量的无关,这也为肿瘤与TNF- $\alpha$ 抑制剂间的相关性提供了依据,并且显示出剂量依赖关系。大多数肿瘤都有以年计算的潜伏期,这样在6个月临床试验期诊断的肿瘤可能在研究入组前就为肿瘤前的状态,TNF- $\alpha$ 抑制剂加速了它的发展<sup>115,116</sup>。然而,一项包含有63项RCTs研究,且总患者数超过29 000例的meta分析却未得到同样的结果,这些临床试验药物包括阿那白滞素、利妥昔单抗、托珠单抗和TNF- $\alpha$ 抑制剂<sup>117</sup>。无论是用bDMARD单药治疗,还是联合甲氨蝶呤治疗,均未显示会增加肿瘤的风险。实际上,阿那白滞素加甲氨蝶呤与单用甲氨蝶呤相比,肿瘤的风险减少(比值比0.11, 0.03~0.45)。

近期的一篇meta分析纳入了包含44项临床试验,包括了11 700例接受TNF- $\alpha$ 抑制剂以及5 901例接受安慰剂或csDMARD的RA患者,结果也未发现TNF- $\alpha$ 抑制剂治疗会增加肿瘤的风险(比值比1.29, 0.85~1.97)<sup>118</sup>。一项长期的托珠单抗单臂扩展

研究,对4 527例患者进行了3年的随访,其中117例发生肿瘤(标准化的发病率0.79, 0.66~0.95)<sup>119</sup>。

#### 观察性资料

观察性研究以及国家注册研究似乎更适合评价bDMARDs长期使用与肿瘤风险的相关性。一项美国的观察性研究对13 001例RA患者进行了大约49 000人年的随访观察,与来自于美国国家癌症研究所监测、流行病学和结果(SEER)数据库的资料进行比较,对比肿瘤的发生率<sup>120</sup>。bDMARDs与非黑色素瘤皮肤癌风险的升高显著相关(比值比1.5, 1.2~1.8),与黑色素瘤可能相关(2.3, 0.9~5.4),与实体肿瘤无关。风险的增加独立于年龄、性别、教育水平、吸烟史和激素的使用,对RA严重程度进行校正以后发现其与淋巴瘤无关。

BSRBR也报道了较低的实体瘤风险(危害比0.83, 0.64~1.07)<sup>121</sup>。同样,一项进行了14年的来自中国台湾的研究比较了4 426例使用TNF- $\alpha$ 抑制剂

和17 704例使用csDMARD的患者,发现TNF- $\alpha$ 抑制剂组发生肿瘤的风险更低(调整后的危害比为0.63, 0.49~0.80)<sup>122</sup>。然而,由于进入RCT研究和系统性综述的临床研究所选择的病例基本上都排除了既往患有肿瘤的患者,因此很难得出任何关于bDMARDs和肿瘤复发风险间关系的确切结论。

两项欧洲的临床注册研究分析了使用bDMARDs的患者的肿瘤复发风险。德国生物制剂注册中心(RABBIT)随访了122例之前患有124种肿瘤的患者(6例淋巴瘤和118例实体瘤),并与4 998例未患肿瘤的患者进行比较<sup>98</sup>。随访至少1年后发现,与使用csDMARD相比,使用TNF- $\alpha$ 抑制剂的患者的肿瘤复发的发生率比为1.4 (0.5~5.5;  $P=0.63$ )。另外一项来自BSRBR的研究对比了117例使用TNF- $\alpha$ 抑制剂和117例使用csDMARDs的RA患者肿瘤的发生率,结果显示,TNF- $\alpha$ 抑制剂组为25.3/1 000人年,csDMARDs组为38.3/1 000人年,调整年龄和性别后,TNF- $\alpha$ 抑制剂组与csDMARDs组的肿瘤发生率比为0.58(0.23~1.43)<sup>99</sup>。作者认为TNF- $\alpha$ 抑制剂组较低的比例是因为选择偏倚——医生可能更加倾向于让处于较长缓解期(“低级别”肿瘤)的患者使用TNF- $\alpha$ 抑制剂,而让具有更大复发可能的患者使用csDMARDs。

对来自于瑞典生物制剂注册中心(ARTIS)的数据进行了调查,评估了女性RA患者乳腺癌复发的风险,120例患者使用了TNF- $\alpha$ 抑制剂,选取了120例未用生物制剂的患者进行匹配,两组患者复发率相似(15/1 000人年以及16/1 000人年),调整后的危害比为1.1(0.4~2.8),表明TNF- $\alpha$ 抑制剂并不增加肿瘤复发的风险。然而,有病例报道提出使用阿巴西普和TNF- $\alpha$ 抑制剂的患者其鳞状细胞皮肤癌迅速进展,这使得我们应该更加关注生物制剂对于肿瘤细胞的滋养效应<sup>123,124</sup>。

#### 说明

虽然这些资料可以提供有用信息,但仍应该谨慎地解读。医生选择患者使用bDMARDs治疗是基于患者的肿瘤类型和病史,例如,RABBIT注册研究中,与前列腺癌患者相比,乳腺癌患者接受bDMARDs治疗的可能性更小。然而,在其他研究中通常不会报道特定肿瘤类型的相关资料。

研究中提到的肿瘤和开始bDMARD治疗的时间间隔通常较长,正如在RABBIT(5年)和BSRBR(11.5年)研究中的那样,这就使得这些结果可能在

新近诊断肿瘤方面不适用。

#### 推荐(表2)

目前有关合并肿瘤的RA患者使用bDMARDs治疗的指南主要是基于循证医学数据和专家意见。加拿大风湿病学会(CRA)总结的共识性意见中提出,不支持可能需要手术、化疗或放疗的活动性肿瘤患者使用bDMARDs<sup>125</sup>。ACR和CRA也都推荐对于有长期肿瘤病史的患者应谨慎地使用bDMARDs,而对于新近发生肿瘤的患者应避免使用这类药物<sup>29,125</sup>。两个学会也都推荐对于有实体瘤、淋巴瘤、非黑色素瘤皮肤癌或已获得5年缓解的黑色素瘤病史的患者,可以考虑使用利妥昔单抗。我们建议既往患有肿瘤的患者应该进行全面的肿瘤相关监测,并在咨询肿瘤科医生之后再决定如何开始治疗。

#### 间质性肺病(ILD)

RA相关ILD的患病率为10%~50%,取决于不同的研究人群和诊断标准。它与老年发病、男性、严重RA、csDMARD使用,特别是甲氨蝶呤和来氟米特的使用有关<sup>126-129</sup>。

bDMARD和原发的或继发于RA的ILD之间的相关性非常复杂,新近资料显示二者间相关性不明确,有必要予以重视,以及无特异的生物学标志物<sup>130</sup>。TNF- $\alpha$ 抑制剂、托珠单抗和利妥昔单抗都与RA相关ILD的发生有关,然而这些bDMARDs也同样用于它的治疗<sup>131-135</sup>。

一项来自美国的队列研究,对超过8 000例的RA患者进行了10年随访,结果显示使用TNF- $\alpha$ 抑制剂和csDMARDs,两组中RA相关的ILD的发生没有显著差异(调整后的危害比为1.03, 0.51~2.07)<sup>136</sup>。近期的一篇系统性综述得出结论,甲氨蝶呤、来氟米特、TNF- $\alpha$ 抑制剂、托珠单抗和利妥昔单抗都可能会诱导或加重之前存在的RA相关ILD<sup>137</sup>。

BSRBR的数据中确定了367例合并有ILD的RA患者,其中29例接受TNF- $\alpha$ 抑制剂,68例接受csDMARD<sup>138</sup>。吸烟并非ILD的决定因素。在校正年龄、性别、病程、RA严重程度、激素和甲氨蝶呤使用等因素后发现,TNF- $\alpha$ 抑制剂与csDMARDs相比的病死率比为0.81(0.38~1.73)。然而,RA相关ILD被列为21%TNF- $\alpha$ 抑制剂患者的死因,3倍于服用csDMARDs者。



### 推荐(表2)

由于缺乏RA相关ILD的对照研究的资料,因而对于该类患者目前还没有制定出使用bDMARDs或csDMARDs的推荐。我们所提出的方法是基于来自特发性肺纤维化及系统性硬化症相关ILD资料的假设<sup>101</sup>。患者应该筛查肺功能,一氧化碳肺弥散功能低于70%及存在肺部症状的患者应被推荐进行高分辨CT检查。在决定使用bDMARDs前,应该考虑患者的基础情况和可能的并发症,并且咨询呼吸科医生。应询问并记录伴有ILD的RA患者的任何呼吸道症状,没有症状的患者每3~6个月应进行一氧化碳肺弥散功能检测以监测患者的肺功能<sup>101</sup>。

### COPD

RA和COPD都很常见,吸烟是二者共同的致病性触发因素,两者也可以并存。TNF- $\alpha$ 参与哮喘和COPD的发病机制,但是TNF- $\alpha$ 抑制剂用于两病的临床试验所得的结论混杂不一<sup>139</sup>。

一项观察性研究检查了来自于北美保险索赔数据库的15 771例RA和COPD的患者数据,其中1 205例患者由于COPD住院,12 050例作为对照<sup>102</sup>。在过去一年中,使用依那西普的患者校正后的住院相对风险为0.47(0.26~0.85),而使用英夫利西单抗却未见获益(1.14, 0.66~1.99)。相反,在一项阿巴西普治疗RA的主要临床试验中有4%的患者存在COPD,37例接受阿巴西普治疗,17例为安慰剂。呼吸道并发症的表现包括咳嗽、干啰音、呼吸困难,结果显示43.2%的接受阿巴西普治疗的患者COPD加重,而安慰剂组为23.5%。这表明有COPD病史的患者需要谨慎使用阿巴西普,而COPD未得到控制的患者要避免使用<sup>103</sup>。

### 推荐(表2)

我们建议TNF- $\alpha$ 抑制剂可用于伴有COPD的RA患者,但医生应警惕患者肺部感染的发生。有症状的COPD患者避免使用阿巴西普<sup>103</sup>。

### 糖尿病

RA可能导致糖耐量受损,且与炎症程度有关<sup>140</sup>。TNF- $\alpha$ 水平在慢性高糖血症患者体内是增高的,它会降低胰岛素的敏感性,影响伤口愈合,也可以影响糖尿病的其他并发症。1型糖尿病的特点是免疫介导的胰岛 $\beta$ 细胞破坏<sup>141</sup>。

理论上抑制TNF- $\alpha$ 可以通过防止胰岛细胞的

破坏,从而减轻胰岛素抵抗。据报道英夫利昔单抗可以改善RA患者的胰岛素抵抗,减少1型糖尿病患者对胰岛素的需求<sup>8</sup>。利妥昔单抗和阿巴西普可以延迟C肽反应的损失,表明可改善胰岛 $\beta$ 细胞的存活<sup>142,143</sup>。与RA相似,糖尿病与心血管疾病风险增加有关,两者并存时会使粥样硬化呈指数级增加。

一项依那西普治疗RA的安慰剂对照安全性临床试验入组了265例伴有糖尿病的患者,评价并随访3.5年,未发现感染风险增加<sup>104</sup>。据报道10例RA伴2型糖尿病患者使用托珠单抗治疗1个月后,其糖化血红蛋白水平得到改善<sup>105</sup>。有趣的是,29例不伴糖尿病的患者均未出现血糖降低,表明其降糖效应不是通过胰岛素分泌介导的,而是通过控制炎症、降低胰岛素抵抗实现的。然而,至少有一篇报道描述了一例1型糖尿病患者注射阿达木单抗12小时内发生了严重的低血糖。其他bDMARDs似乎都具有较好的耐受性,但是相关证据较少。

### 推荐

伴有糖尿病的患者对bDMARDs的耐受性很好。然而,我们推荐使用bDMARDs时应注意感染风险的增加,伴有脆性糖尿病的患者开始使用TNF- $\alpha$ 抑制剂时,应监测低血糖症状的发生。

### 慢性肾损害

慢性肾损害是甲氨蝶呤的禁忌证,如果能证明bDMARDs是安全和有效的,那么可能是一个好的选择。然而,许多甲氨蝶呤和bDMARDs比较的RCTs研究都排除了有慢性肾损害的患者。有一项依那西普针对血透患者的开放性研究,2例为RA,其他为脊柱关节炎,随访了18个月。2例RA患者达到了病情活动度积分小于3.2(低疾病活动度)而未出现并发症<sup>144</sup>。我们未发现有使用托珠单抗、阿巴西普及利妥昔单抗治疗RA伴慢性肾损害患者的报道。

### 推荐

可考虑将bDMARDs用于伴有慢性肾损害的RA患者,但推荐与患者本人及其肾科医生共同讨论。

### 妊娠

RA主要累及育龄期的女性,因此在孕前、孕中、产后及哺乳期该如何使用bDMARDs是需重点考虑的问题。

所有的TNF- $\alpha$ 抑制剂都为美国食品与药品管理局(FDA)妊娠分级“B”级——动物繁殖研究未发

现对胎儿有风险,但在妊娠妇女人群中缺乏足够的对照研究。然而,阿巴西普、利妥昔单抗和托珠单抗为FDA妊娠分级“C”级——动物繁殖研究显示对胎儿有不良反应,但在人类中缺乏足够的对照研究,尽管妊娠妇女使用有潜在的风险,但其潜在获益可使其成为合理药物<sup>145</sup>。

一项前瞻性研究报道了妊娠期RA患者的病情活动有显著的变动,并挑战了此前关于妊娠期间病情缓解、产后有病情加重的风险的报道<sup>146</sup>。考虑到妊娠期间禁忌使用如甲氨蝶呤和来氟米特等csDMARDs, bDMARDs以及硫酸羟氯喹和柳氮磺吡啶可作为受孕期和怀孕期的治疗选择。

调查中,尽管考虑到RA女性本来就可能出现较高的独立于DMARD治疗的不良妊娠后果发生率(低出生体重、自发流产率增加)<sup>147,148</sup>,执业风湿科医生对于在怀孕期间使用依那西普和英夫利西单抗的风险仍表示不确定。

BSRBR评价了130例在受孕前或受孕时接受了TNF- $\alpha$ 抑制剂的RA妇女妊娠的预后,并与10例单用csDMARDs的患者进行比较。使用TNF- $\alpha$ 抑制剂的妇女有27%的自发流产率(高于伴随使用甲氨蝶呤或来氟米特者),使用csDMARDs的妇女为10%,然而差异无统计学意义。研究中报道4例使用TNF- $\alpha$ 抑制剂的妇女孕育先天畸形婴儿,而单用csDMARDs则无报道<sup>107</sup>。目前没有出现过VACTERL综合征[椎体畸形、肛门闭锁、心脏缺陷、气管食管瘘和(或)食道闭锁、肾和桡骨畸形及肢体缺陷]的病例报道。一篇FDA数据库关于TNF- $\alpha$ 抑制剂不良事件的综述报道了1例出生之前暴露于依那西普的VACTERL综合征病例。另外,其他19种与VACTERL谱一致的先天畸形也曾被报道,与报道的一般人群相比,这一人群的先天畸形出生率明显增高( $P<0.01$ )<sup>149</sup>。

发表于2014年的系统性综述支持在受孕或怀孕期间使用TNF- $\alpha$ 抑制剂并不存在风险<sup>145,150</sup>。然而,在各种TNF- $\alpha$ 抑制剂中,与英夫利西单抗和阿达木单抗相比,赛妥珠单抗有着最少的胎盘通过率<sup>151</sup>,出生时索血中的赛妥珠单抗仅为母体的3.9%,而英夫利西单抗和阿达木单抗分别为160%和153%。

对于利妥昔单抗,目前的指南主要基于非RA患者的资料,推荐在其暴露后12个月内采取有效的避孕方法避免怀孕。这是因为尚不清楚利妥昔

单抗对胎儿或新生儿的B细胞清除效应,另外,已有先天畸形、流产和早产的报道<sup>150</sup>。

目前并没有关于男性患者在性伴受孕期间接受TNF- $\alpha$ 抑制剂治疗导致孕妇或婴儿出现不良妊娠结果的报道<sup>94</sup>。然而对于女性来说,当最后一次利妥昔单抗输注6个月以上再尝试怀孕更为合适。目前发表的关于其他bDMARDs与妊娠有关的文章数量还非常有限。

#### 哺乳

从猴的乳汁中可检测出利妥昔单抗,因此,尽管还未确定人类的乳汁中是否能检测出该药物,不建议哺乳<sup>94</sup>。TNF- $\alpha$ 抑制剂在乳汁中的水平很低,测出值的范围从不可测出到为母体循环的20%,婴儿血清中药物的水平也很低或测不出<sup>150</sup>。病例报道显示母亲哺乳期间继续使用TNF- $\alpha$ 抑制剂对婴儿没有不良影响<sup>152</sup>。

#### 推荐(表2)

由于缺乏循证医学的证据,尚无指南说明计划怀孕、已经怀孕或希望哺乳的RA患者该如何使用bDMARDs,但是一些观察性的资料表明TNF- $\alpha$ 抑制剂至少是一种有风险的选择。我们推荐如果考虑使用bDMARDs,风湿科医生应该和育龄期妇女进行知情谈话。如果怀孕期继续使用TNF- $\alpha$ 抑制剂,推荐进食安全的食物(例如避免加工肉制品、未经高温消毒的牛奶和奶酪),虽然这适用于所有的怀孕妇女,但是应该强调如李斯特菌的胞内感染风险是增加的。出生前暴露于TNF- $\alpha$ 抑制剂的婴儿在出生后至少6个月才能进行活疫苗接种<sup>150</sup>。

### 对患者最重要的事情

考虑到bDMARDs可能会加重合并症,详细告知患者潜在的并发症是非常重要的。患者将会想要获得一些关于bDMARDs对他们的合并症相关生活质量影响方面的资料,因为生活质量是他们是否愿意接受治疗风险的主要决定因素。在我们的研究中,我们发现仅有一篇文章调查了伴有合并症的RA患者在使用bDMARDs后的生活质量情况。

来自于德国生物制剂注册中心RABBIT的数据显示,合并症数量的增多与一种或多种bDMARDs治疗无效相关<sup>153</sup>。进一步说,未能达到最小可测生活质量改善的患者比例和合并症的数量相关。在伴有0、1、2或更多种合并症的患者中,分别有61.9%、

65.8%及67.5%的患者未能达到最小可测生活质量改善。有关生活质量的资料缺乏使得患者和医生都难以对治疗做出决定。医生需要评估患者生活质量的不同方面——生理、心理和社会层面——并确定生活质量的降低源于RA或合并症。bDMARD治疗并不能够改善与RA疾病无关的生活质量降低,因此当评估bDMARD是否为合适的治疗方法时,应全面考虑疾病和患者两方面因素。

## 结论

虽然bDMARDs显著改善RA患者的预后,但其新的作用机制对于存在合并症的患者来说仍是一种挑战。bDMARDs对于慢性病患者的安全性和有效性仍未得到RCTs研究的确认,观察性研究由于试验设计和预后记录指标的不同常常得出矛盾的结论。慢性病的注册研究可以提供非常好的证据,以分析bDMARDs对于RA患者长期使用的安全性,然而,仅仅记录是否存在合并症是不够的,还需要收集有关发病、严重程度和相关并发症的详细资料。对这些资料进行分析有助于明确bDMARDs对于合并症的可能益处,例如可以改善糖尿病患者的血糖控制。

考虑到bDMARDs可能会加重合并症,详细告知患者潜在的并发症是非常重要的。患者将会要求获得一些关于bDMARDs对他们的合并症相关生活质量影响方面的资料,因为生活质量是其是否愿意接受治疗风险的主要决定因素。在我们的研究中,我们发现仅有一篇文章调查了伴有合并症的RA患者在使用bDMARDs后的生活质量情况。在选择合适的bDMARD时,应该全面考虑疾病和患者两方面因素。在未来的研究中,应该收集RA临床试验及注册资料中有关合并症恶化及严重程度的数据,以便医生和患者在存在合并症的情况下准确评估风险和获益。

Thanks to Jan Edmiston for her assistance with database searches and to the patients at the Washington DC Veterans Affairs Medical Center for their review of the manuscript and comments.

贡献者 (Contributors): All authors helped in the design of the work; the acquisition, analysis, and interpretation of the data; and the revision of the manuscript. All authors approved the version to be published and are accountable for all aspects of the article. JSR is guarantor.

利益竞争 (Competing interests): We have read and understood BMJ policy on declaration of interests and declare the following interests: none.

来源与同行评议 (Provenance and peer review): Commissioned; externally peer reviewed. The views expressed in this article are those of the authors and do not necessarily reflect the positions or policies of the Department of Veterans Affairs or the Federal Government of the United States.

## 参考文献

- 1 Cross M, Smith E, Hoy D, et al. The global burden of rheumatoid arthritis: estimates from the global burden of disease 2010 study. *Ann Rheum Dis* 2014;73:1316-22.
- 2 Dadoun S, Zeboulon-Ktorza N, Combescure C, et al. Mortality in rheumatoid arthritis over the last fifty years: systematic review and metaanalysis. *Joint Bone Spine* 2013;80:29-33.
- 3 Sokka T, Abelson B, Pincus T. Mortality in rheumatoid arthritis: 2008 update. *Clin Exp Rheumatol* 2008;26(5 suppl 51):S35-61.
- 4 Kapetanovic MC, Lindqvist E, Geborek P, et al. Long-term mortality rate in rheumatoid arthritis patients with disease onset in the 1980s. *Scand J Rheumatol* 2011;40:433-8.
- 5 Tiippana-Kinnunen T, Kautiainen H, Paimela L, et al. Co-morbidities in Finnish patients with rheumatoid arthritis: 15-year follow-up. *Scand J Rheumatol* 2013;42:451-6.
- 6 Mathias SD, Colwell HH, Miller DP, et al. Health-related quality of life and functional status of patients with rheumatoid arthritis randomly assigned to receive etanercept or placebo. *Clin Ther* 2000;22:128-39.
- 7 Dixon WG, Watson KD, Lunt M, et al. Reduction in the incidence of myocardial infarction in patients with rheumatoid arthritis who respond to anti-tumor necrosis factor alpha therapy: results from the British Society for Rheumatology Biologics Register. *Arthritis Rheum* 2007;56:2905-12.
- 8 Gonzalez-Gay MA, De Matias JM, Gonzalez-Juanatey C, et al. Anti-tumor necrosis factor-alpha blockade improves insulin resistance in patients with rheumatoid arthritis. *Clin Exp Rheumatol* 2006;24:83-6.
- 9 Smolen JS, Landewe R, Breedveld FC, et al. EULAR recommendations for the management of rheumatoid arthritis with synthetic and biological disease-modifying antirheumatic drugs: 2013 update. *Ann Rheum Dis* 2014;73:492-509.
- 10 Gaujoux-Viala C, Gossec L, Cantagrel A, et al. Recommendations of the French Society for Rheumatology for managing rheumatoid arthritis. *Joint Bone Spine* 2014;81:287-97.
- 11 Nota I, Drossaert CH, Taal E, et al. Patient participation in decisions about disease modifying anti-rheumatic drugs: a cross-sectional survey. *BMC Musculoskelet Disord* 2014;15:333.
- 12 Carroll MB, Bond MI. Use of tumor necrosis factor-alpha inhibitors in patients with chronic hepatitis B infection. *Semin Arthritis Rheum* 2008;38:208-17.
- 13 Montiel PM, Solis JA, Chirinos JA, et al. Hepatitis B virus reactivation during therapy with etanercept in an HBsAg-negative and anti-HBs-positive patient. *Liver Int* 2008;28:718-20.
- 14 Verhelst X, Orlent H, Colle I, et al. Subfulminant hepatitis B during treatment with adalimumab in a patient with rheumatoid arthritis and chronic hepatitis B. *Eur J Gastroenterol Hepatol* 2010;22:494-9.
- 15 Pырpasopoulou A, Douma S, Vassiliadis T, et al. Reactivation of chronic hepatitis B virus infection following rituximab administration for rheumatoid arthritis. *Rheumatol Int* 2011;31:403-4.
- 16 Kim SJ, Hsu C, Song YQ, et al. Hepatitis B virus reactivation in B-cell lymphoma patients treated with rituximab: analysis from



- the Asia Lymphoma Study Group. *Eur J Cancer* 2013;49:3486-96.
- 17 Koo YX, Tay M, Teh YE, et al. Risk of hepatitis B virus (HBV) reactivation in hepatitis B surface antigen negative/hepatitis B core antibody positive patients receiving rituximab-containing combination chemotherapy without routine antiviral prophylaxis. *Ann Hematol* 2011;90:1219-23.
  - 18 Huang YH, Hsiao LT, Hong YC, et al. Randomized controlled trial of entecavir prophylaxis for rituximab-associated hepatitis B virus reactivation in patients with lymphoma and resolved hepatitis B. *J Clin Oncol* 2013;31:2765-72.
  - 19 Ghrenassia Mekinian A, Rouaghe S, et al. Reactivation of resolved hepatitis B during rituximab therapy for rheumatoid arthritis. *Joint Bone Spine* 2012;79:100-1.
  - 20 Sarrecchia C, Cappelli A, Aiello P. HBV reactivation with fatal fulminating hepatitis during rituximab treatment in a subject negative for HBsAg and positive for HBsAb and HBcAb. *J Infect Chemother* 2005;11:189-91.
  - 21 Kim PS, Ho GY, Prete PE, et al. Safety and efficacy of abatacept in eight rheumatoid arthritis patients with chronic hepatitis B. *Arthritis Care Res (Hoboken)* 2012;64:1265-8.
  - 22 Germanidis G, Hytiroglou P, Zakalka M, et al. Reactivation of occult hepatitis B virus infection, following treatment of refractory rheumatoid arthritis with abatacept. *J Hepatol* 2012;56:1420-1.
  - 23 Tsuboi H, Tsujii A, Nampei A, et al. A patient with rheumatoid arthritis treated with tocilizumab together with lamivudine prophylaxis after remission of infliximab-reactivated hepatitis B. *Mod Rheumatol* 2011;21:701-5.
  - 24 Kishida D, Okuda Y, Onishi M, et al. Successful tocilizumab treatment in a patient with adult-onset Still's disease complicated by chronic active hepatitis B and amyloid A amyloidosis. *Mod Rheumatol* 2011;21:215-8.
  - 25 Nagashima T, Minota S. Long-term tocilizumab therapy in a patient with rheumatoid arthritis and chronic hepatitis B. *Rheumatology (Oxford)* 2008;47:1838-40.
  - 26 Barone M, Notarnicola A, Lopalco G, et al. Safety of long-term biologic therapy in rheumatologic patients with a previously resolved hepatitis B viral infection. *Hepatology* 2015;62:40-6.
  - 27 Lok As, Lai CL, Leung N, et al. Long-term safety of lamivudine treatment in patients with chronic hepatitis B. *Gastroenterology* 2003;125:1714-22.
  - 28 Ono A, Suzuki F, Kawamura Y, et al. Long-term continuous entecavir therapy in nucleo(t)ide-naive chronic hepatitis B patients. *J Hepatol* 2012;57:508-14.
  - 29 Singh JA, Furst DE, Bharat A, et al. 2012 update of the 2008 American College of Rheumatology recommendations for the use of disease modifying antirheumatic drugs and biologic agents in the treatment of rheumatoid arthritis. *Arthritis Care Res (Hoboken)* 2012;64:625-39.
  - 30 Reddy KR, Beavers KL, Hammond SP, et al. American Gastroenterological Association Institute guideline on the prevention and treatment of hepatitis B virus reactivation during immunosuppressive drug therapy. *Gastroenterology* 2015;148:215-9; quiz e16-7.
  - 31 Rahier JF, Ben-Horin S, Chowers Y, et al. European evidence-based consensus on the prevention, diagnosis and management of opportunistic infections in inflammatory bowel disease. *J Crohns Colitis* 2009;3:47-91.
  - 32 Lau GK. Hepatitis B reactivation after chemotherapy: two decades of clinical research. *Hepatol Int* 2008;2:152-62.
  - 33 Liaw YF, Leung N, Kao JH, et al. Asian-Pacific consensus statement on the management of chronic hepatitis B: a 2008 update. *Hepatol Int* 2008;2:263-83.
  - 34 Brunasso AM, Puntoni M, Gulia A, et al. Safety of anti-tumour necrosis factor agents in patients with chronic hepatitis C infection: a systematic review. *Rheumatology (Oxford)* 2011;50:1700-11.
  - 35 Askling J, Fored CM, Brandt L, et al. Risk and case characteristics of tuberculosis in rheumatoid arthritis associated with tumor necrosis factor antagonists in Sweden. *Arthritis Rheum* 2005;52:1986-92.
  - 36 Cepeda EJ, Williams FM, Ishimori ML, et al. The use of anti-tumour necrosis factor therapy in HIV-positive individuals with rheumatic disease. *Ann Rheum Dis* 2008;67:710-2.
  - 37 Boue F, Gabarre J, Gisselbrecht C, et al. Phase II trial of CHOP plus rituximab in patients with HIV-associated non-Hodgkin's lymphoma. *J Clin Oncol* 2006;24:4123-8.
  - 38 European Association for the Study of the Liver. EASL clinical practice guidelines: management of chronic hepatitis B virus infection. *J Hepatol* 2012;57:167-85.
  - 39 Perrillo RP, Gish R, Falck-Ytter YT. American Gastroenterological Association Institute technical review on prevention and treatment of hepatitis B virus reactivation during immunosuppressive drug therapy. *Gastroenterology* 2015;148:221-44 e3.
  - 40 Caporali R, Bobbio-Pallavicini F, Atzeni F, et al. Safety of tumor necrosis factor alpha blockers in hepatitis B virus occult carriers (hepatitis B surface antigen negative/anti-hepatitis B core antigen positive) with rheumatic diseases. *Arthritis Care Res (Hoboken)* 2010;62:749-54.
  - 41 Zein NN. Etanercept as an adjuvant to interferon and ribavirin in treatment-naive patients with chronic hepatitis C virus infection: a phase 2 randomized, double-blind, placebo-controlled study. *J Hepatol* 2005;42:315-22.
  - 42 Cavazzana I, Ceribelli A, Cattaneo R, et al. Treatment with etanercept in six patients with chronic hepatitis C infection and systemic autoimmune diseases. *Autoimmun Rev* 2008;8:104-6.
  - 43 Aslanidis S, Vassiliadis T, Pырpasopoulou A, et al. Inhibition of TNFalpha does not induce viral reactivation in patients with chronic hepatitis C infection: two cases. *Clin Rheumatol* 2007;26:261-4.
  - 44 Yazici O, Sendur MA, Aksoy S. Hepatitis C virus reactivation in cancer patients in the era of targeted therapies. *World J Gastroenterol* 2014;20:6716-24.
  - 45 Ennishi D, Maeda Y, Niitsu N, et al. Hepatic toxicity and prognosis in hepatitis C virus-infected patients with diffuse large B-cell lymphoma treated with rituximab-containing chemotherapy regimens: a Japanese multicenter analysis. *Blood* 2010;116:5119-25.
  - 46 Coppola N, Pisaturo M, Guastafierro S, et al. Increased hepatitis C viral load and reactivation of liver disease in HCV RNA-positive patients with onco-haematological disease undergoing chemotherapy. *Dig Liver Dis* 2012;44:49-54.
  - 47 Lin KM, Lin JC, Tseng WY, et al. Rituximab-induced hepatitis C virus reactivation in rheumatoid arthritis. *J Microbiol Immunol Infect* 2013;46:65-7.
  - 48 Ferri C, Cacoub P, Mazzaro C, et al. Treatment with rituximab in patients with mixed cryoglobulinemia syndrome: results of multicenter cohort study and review of the literature. *Autoimmun Rev* 2011;11:48-55.
  - 49 Saag KG, Teng GG, Patkar NM, et al. American College of Rheumatology 2008 recommendations for the use of nonbiologic and biologic disease modifying antirheumatic drugs in rheumatoid

- arthritis. *Arthritis Rheum* 2008;59:762-84.
- 50 Mahajan TD, Hooker R, Maher L, et al. Abatacept therapy for rheumatoid arthritis in the setting of hepatitis C infection. *J Clin Rheumatol* 2010;16:332-4.
- 51 Dragonas C, Ehrenstein B, Fleck M. Tocilizumab treatment in a patient suffering from rheumatoid arthritis and concomitant chronic hepatitis C infection. *Rheumatology (Oxford)* 2012;51:1520-1.
- 52 Nagashima T, Maruyama A, Kamata Y, et al. Unchanged serum viral load and liver function during tocilizumab treatment in a patient with rheumatoid arthritis and hepatitis C virus infection. *Rheumatol Int* 2012;32:2231-2.
- 53 Mori S, Fujiyama S. Comment on: Tocilizumab treatment in a patient suffering from rheumatoid arthritis and concomitant chronic hepatitis C infection. *Rheumatology (Oxford)* 2012; 51:2300-2; author reply 2.
- 54 Streetz KL, Luedde T, Manns MP, et al. Interleukin 6 and liver regeneration. *Gut* 2000;47:309-12.
- 55 Wang Y, Metselaar HJ, Peppelenbosch MP, et al. Chronic hepatitis E in solid-organ transplantation: the key implications of immunosuppressants. *Curr Opin Infect Dis* 2014;27:303-8.
- 56 Bauer H, Sibilja J, Moreau P, et al. Acute hepatitis E during biotherapy. *Joint Bone Spine* 2013;80:91-2.
- 57 Roux CH, Anty R, Patouraux S, et al. Hepatitis E: are rheumatic patients at risk? *J Rheumatol* 2013;40:99.
- 58 Sichelidis L, Settas L, Spyrtos D, et al. Tuberculosis in patients receiving anti-TNF agents despite chemoprophylaxis. *Int J Tuberc Lung Dis* 2006;10:1127-32.
- 59 Winthrop KL, Chang E, Yamashita S, et al. Nontuberculous mycobacteria infections and anti-tumor necrosis factor- $\alpha$  therapy. *Emerg Infect Dis* 2009;15:1556-61.
- 60 Gomez-Reino JJ, Carmona L, Valverde VR, et al. Treatment of rheumatoid arthritis with tumor necrosis factor inhibitors may predispose to significant increase in tuberculosis risk: a multicenter active-surveillance report. *Arthritis Rheum* 2003;48:2122-7.
- 61 Ottaviani S, Tiendrebeogo J, Choudat L, et al. Knee tuberculosis under rituximab therapy for rheumatoid arthritis. *Joint Bone Spine* 2013;80:435-6.
- 62 Pehlivan Y, Kisacik B, Bosnak VK, et al. Rituximab seems to be a safer alternative in patients with active rheumatoid arthritis with tuberculosis. *BMJ Case Rep* 2013;2013; doi:10.1136/bcr-2012-006585.
- 63 Salliot C, Dougados M, Gossec L. Risk of serious infections during rituximab, abatacept and anakinra treatments for rheumatoid arthritis: meta-analyses of randomised placebo-controlled trials. *Ann Rheum Dis* 2009;68:25-32.
- 64 Souto A, Maneiro JR, Salgado E, et al. Risk of tuberculosis in patients with chronic immune-mediated inflammatory diseases treated with biologics and tofacitinib: a systematic review and meta-analysis of randomized controlled trials and long-term extension studies. *Rheumatology (Oxford)* 2014;53:1872-85.
- 65 Schiff MH, Kremer JM, Jahreis A, et al. Integrated safety in tocilizumab clinical trials. *Arthritis Res Ther* 2011;13:R141.
- 66 Furst DE, Keystone EC, So AK, et al. Updated consensus statement on biological agents for the treatment of rheumatic diseases, 2012. *Ann Rheum Dis* 2013;72(suppl 2):ii2-34.
- 67 Hatemi G, Yazici H. Tuberculosis screening before and during treatment with tumor necrosis factor antagonists: something old, something new. *J Rheumatol* 2013;40:1938-40.
- 68 Aboulafia DM, Bundow D, Wilske K, et al. Etanercept for the treatment of human immunodeficiency virus-associated psoriatic arthritis. *Mayo Clin Proc* 2000;75:1093-8.
- 69 Hua C, Barnetche T, Combe B, et al. Effect of methotrexate, anti-tumor necrosis factor alpha, and rituximab on the immune response to influenza and pneumococcal vaccines in patients with rheumatoid arthritis: a systematic review and meta-analysis. *Arthritis Care Res (Hoboken)* 2014;66:1016-26.
- 70 Eisenberg RA, Jawad AF, Boyer J, et al. Rituximab-treated patients have a poor response to influenza vaccination. *J Clin Immunol* 2013;33:388-96.
- 71 Van Assen S, Holvast A, Benne CA, et al. Humoral responses after influenza vaccination are severely reduced in patients with rheumatoid arthritis treated with rituximab. *Arthritis Rheum* 2010; 62:75-81.
- 72 Van Assen S, Agmon-Levin N, Elkayam O, et al. EULAR recommendations for vaccination in adult patients with autoimmune inflammatory rheumatic diseases. *Ann Rheum Dis* 2011;70:414-22.
- 73 Bingham CO 3rd, Looney RJ, Deodhar A, et al. Immunization responses in rheumatoid arthritis patients treated with rituximab: results from a controlled clinical trial. *Arthritis Rheum* 2010;62:64-74.
- 74 Tay L, Leon F, Vratsanos G, et al. Vaccination response to tetanus toxoid and 23-valent pneumococcal vaccines following administration of a single dose of abatacept: a randomized, open-label, parallel group study in healthy subjects. *Arthritis Res Ther* 2007;9:R38.
- 75 Mori S, Ueki Y, Hirakata N, et al. Impact of tocilizumab therapy on antibody response to influenza vaccine in patients with rheumatoid arthritis. *Ann Rheum Dis* 2012;71:2006-10.
- 76 Mori S, Ueki Y, Akeda Y, et al. Pneumococcal polysaccharide vaccination in rheumatoid arthritis patients receiving tocilizumab therapy. *Ann Rheum Dis* 2013;72:1362-6.
- 77 Bingham CO 3rd, Rizzo W, Kivitz A, et al. Humoral immune response to vaccines in patients with rheumatoid arthritis treated with tocilizumab: results of a randomised controlled trial (VISARA). *Ann Rheum Dis* 2014;74:818-22.
- 78 Rahier JF, Moutschen M, Van Gompel A, et al. Vaccinations in patients with immune-mediated inflammatory diseases. *Rheumatology (Oxford)* 2010;49:1815-27.
- 79 Listing J, Strangfeld A, Kekow J, et al. Does tumor necrosis factor alpha inhibition promote or prevent heart failure in patients with rheumatoid arthritis? *Arthritis Rheum* 2008;58:667-77.
- 80 Gabriel SE. Tumor necrosis factor inhibition: a part of the solution or a part of the problem of heart failure in rheumatoid arthritis? *Arthritis Rheum* 2008;58:637-40.
- 81 Chung ES, Packer M, Lo KH, et al. Randomized, double-blind, placebo controlled, pilot trial of infliximab, a chimeric monoclonal antibody to tumor necrosis factor- $\alpha$ , in patients with moderate-to-severe heart failure. *Circulation* 2003;107:3133-40.
- 82 Coletta AP, Clark AL, Banarjee P, et al. Clinical trials update: RENEWAL (RENAISSANCE and RECOVER) and ATTACH. *Eur J Heart Fail* 2002;4:559-61.
- 83 Cacciapaglia F, Navarini L, Menna P, et al. Cardiovascular safety of anti-TNF-alpha therapies: facts and unsettled issues. *Autoimmun Rev* 2011;10:631-5.
- 84 Khanna D, McMahon M, Furst DE. Anti-tumor necrosis factor alpha therapy and heart failure: what have we learned and where do we go from here? *Arthritis Rheum* 2004;50:1040-50.
- 85 Bili A, Tang X, Pranesh S, et al. Tumor necrosis factor alpha inhibitor use and decreased risk for incident coronary events in rheumatoid arthritis. *Arthritis Care Res (Hoboken)* 2014;66:355-63.

- 86 Abedin M, Scheurich D, Reimold SC, et al. Acute coronary syndrome after infliximab infusion. *Cardiol Rev* 2006;14:50-2.
- 87 Atzeni F, Turiel M, Caporali R, et al. The effect of pharmacological therapy on the cardiovascular system of patients with systemic rheumatic diseases. *Autoimmun Rev* 2010;9:835-9.
- 88 Souto A, Salgado E, Maneiro JR, et al. Lipid profile changes in patients with chronic inflammatory arthritis treated with biologic agents and tofacitinib in randomized clinical trials: a systematic review and meta-analysis. *Arthritis Rheumatol* 2015;67:117-27.
- 89 Genovese MC, McKay JD, Nasonov EL, et al. Interleukin-6 receptor inhibition with tocilizumab reduces disease activity in rheumatoid arthritis with inadequate response to disease-modifying antirheumatic drugs: the tocilizumab in combination with traditional disease-modifying antirheumatic drug therapy study. *Arthritis Rheum* 2008;58:2968-80.
- 90 Genovese MC, Smolen JS, Emery P, et al. Concomitant use of statins in tocilizumab-treated patients with rheumatoid arthritis with elevated low-density lipoprotein cholesterol: analysis of five phase III clinical trials. *Arthritis Rheum* 2008;58:S1672.
- 91 Foran JM, Rohatiner AZ, Cunningham D, et al. European phase II study of rituximab (chimeric anti-CD20 monoclonal antibody) for patients with newly diagnosed mantle-cell lymphoma and previously treated mantle-cell lymphoma, immunocytoma, and small B-cell lymphocytic lymphoma. *J Clin Oncol* 2000;18:317-24.
- 92 Arunprasath P, Gobu P, Dubashi B, et al. Rituximab induced myocardial infarction: a fatal drug reaction. *J Cancer Res Ther* 2011;7:346-8.
- 93 Van Vollenhoven RF, Emery P, Bingham CO 3rd, et al. Long-term safety of rituximab in rheumatoid arthritis: 9.5-year follow-up of the global clinical trial programme with a focus on adverse events of interest in RA patients. *Ann Rheum Dis* 2013;72:1496-502.
- 94 Pham T, Fautrel B, Gottenberg JE, et al. Rituximab (MabThera) therapy and safety management. Clinical tool guide. *Joint Bone Spine* 2008;75(suppl 1):S1-99.
- 95 Pham T, Bachelez H, Berthelot JM, et al. Abatacept therapy and safety management. *Joint Bone Spine* 2012;79(suppl 1):3-84.
- 96 Buch MH, Smolen JS, Betteridge N, et al. Updated consensus statement on the use of rituximab in patients with rheumatoid arthritis. *Ann Rheum Dis* 2011;70:909-20.
- 97 Mariette X, Tubach F, Bagheri H, et al. Lymphoma in patients treated with anti-TNF: results of the 3-year prospective French RATIO registry. *Ann Rheum Dis* 2010;69:400-8.
- 98 Strangfeld A, Hierse F, Rau R, et al. Risk of incident or recurrent malignancies among patients with rheumatoid arthritis exposed to biologic therapy in the German biologics register RABBIT. *Arthritis Res Ther* 2010;12:R5.
- 99 Dixon WG, Watson KD, Lunt M, et al. Influence of anti-tumor necrosis factor therapy on cancer incidence in patients with rheumatoid arthritis who have had a prior malignancy: results from the British Society for Rheumatology Biologics Register. *Arthritis Care Res (Hoboken)* 2010;62:755-63.
- 100 Raaschou P, Frisell T, Askling J. TNF inhibitor therapy and risk of breast cancer recurrence in patients with rheumatoid arthritis: a nationwide cohort study. *Ann Rheum Dis* 2014; published online 8 Aug.
- 101 Jani M, Hirani N, Matteson EL, et al. The safety of biologic therapies in RA-associated interstitial lung disease. *Nat Rev Rheumatol* 2014;10:284-94.
- 102 Suissa S, Ernst P, Hudson M. TNF-alpha antagonists and the prevention of hospitalisation for chronic obstructive pulmonary disease. *Pulm Pharmacol Ther* 2008;21:234-8.
- 103 Weinblatt M, Combe B, Covucci A, et al. Safety of the selective costimulation modulator abatacept in rheumatoid arthritis patients receiving background biologic and nonbiologic disease-modifying antirheumatic drugs: a one-year randomized, placebo-controlled study. *Arthritis Rheum* 2006;54:2807-16.
- 104 Weisman MH, Paulus HE, Burch FX, et al. A placebo-controlled, randomized, double-blinded study evaluating the safety of etanercept in patients with rheumatoid arthritis and concomitant comorbid diseases. *Rheumatology (Oxford)* 2007;46:1122-5.
- 105 Ogata A, Morishima A, Hirano T, et al. Improvement of HbA1c during treatment with humanised anti-interleukin 6 receptor antibody, tocilizumab. *Ann Rheum Dis* 2011;70:1164-5.
- 106 Boulton JG, Bourne JT. Unstable diabetes in a patient receiving anti-TNFalpha for rheumatoid arthritis. *Rheumatology (Oxford)* 2007;46:178-9.
- 107 Verstappen SM, King Y, Watson KD, et al. Anti-TNF therapies and pregnancy: outcome of 130 pregnancies in the British Society for Rheumatology Biologics Register. *Ann Rheum Dis* 2011;70:823-6.
- 108 Peters MJ, Symmons DP, McCarey D, et al. EULAR evidence-based recommendations for cardiovascular risk management in patients with rheumatoid arthritis and other forms of inflammatory arthritis. *Ann Rheum Dis* 2010;69:325-31.
- 109 Mellemejkjaer L, Linet MS, Gridley G, et al. Rheumatoid arthritis and cancer risk. *Eur J Cancer* 1996;32:1753-7.
- 110 Baecklund E, Ekblom A, Soren P, et al. Disease activity and risk of lymphoma in patients with rheumatoid arthritis: nested case-control study. *BMJ* 1998;317:180-1.
- 111 Balkwill F. Tumour necrosis factor and cancer. *Nat Rev Cancer* 2009;9:361-71.
- 112 Coiffier B, Lepage E, Briere J, et al. CHOP chemotherapy plus rituximab compared with CHOP alone in elderly patients with diffuse large-B-cell lymphoma. *N Engl J Med* 2002;346:235-42.
- 113 Nagao A, Nakazawa S, Hanabusa H. Short-term efficacy of the IL6 receptor antibody tocilizumab in patients with HIV-associated multicentric Castleman disease: report of two cases. *J Hematol Oncol* 2014;7:10.
- 114 Bongartz T, Sutton AJ, Sweeting MJ, et al. Anti-TNF antibody therapy in rheumatoid arthritis and the risk of serious infections and malignancies: systematic review and meta-analysis of rare harmful effects in randomized controlled trials. *JAMA* 2006;295:2275-85.
- 115 Rafnsson V, Tulinius H, Jonasson JG, et al. Risk of breast cancer in female flight attendants: a population-based study (Iceland). *Cancer Causes Control* 2001;12:95-101.
- 116 Baldini EH, Strauss GM. Women and lung cancer: waiting to exhale. *Chest* 1997;112(4 suppl):229s-34s.
- 117 Lopez-Olivo MA, Tayar JH, Martinez-Lopez JA, et al. Risk of malignancies in patients with rheumatoid arthritis treated with biologic therapy: a metaanalysis. *JAMA* 2012;308:898-908.
- 118 Michaud TL, Rho YH, Shamliyan T, et al. The comparative safety of TNF inhibitors in rheumatoid arthritis - a meta-analysis update of 44 randomized controlled trials. *Am J Med* 2014;127:1208-32.
- 119 Yamamoto K, Goto H, Hirao K, et al. Long-term safety of tocilizumab: results from 3 years of follow up postmarketing surveillance of 5573 patients with rheumatoid arthritis in Japan. *J Rheumatol* 2015; published online 1 Jun.
- 120 Wolfe F, Michaud K. Biologic treatment of rheumatoid arthritis and the risk of malignancy: analyses from a large US observational study. *Arthritis Rheum* 2007;56:2886-95.



- 121 Mercer LK, Lunt M, Low AL, et al. Risk of solid cancer in patients exposed to anti-tumour necrosis factor therapy: results from the British Society for Rheumatology Biologics Register for Rheumatoid Arthritis. *Ann Rheum Dis* 2015;74:1087-93.
- 122 Wu CY, Chen DY, Shen JL, et al. The risk of cancer in patients with rheumatoid arthritis taking tumor necrosis factor antagonists: a nationwide cohort study. *Arthritis Res Ther* 2014;16:449.
- 123 Smith KJ, Skelton HG. Rapid onset of cutaneous squamous cell carcinoma in patients with rheumatoid arthritis after starting tumor necrosis factor alpha receptor IgG1-Fc fusion complex therapy. *J Am Acad Dermatol* 2001;45:953-6.
- 124 Corcorran MA, Olson JM, Hecht C, et al. Eruptive squamous cell carcinoma in a patient receiving abatacept for rheumatoid arthritis. *J Am Acad Dermatol* 2013;69:e178-9.
- 125 Bombardier C, Hazlewood GS, Akhavan P, et al. Canadian Rheumatology Association recommendations for the pharmacological management of rheumatoid arthritis with traditional and biologic disease-modifying antirheumatic drugs: part II safety. *J Rheumatol* 2012;39:1583-602.
- 126 Kremer JM, Alarcon GS, Weinblatt ME, et al. Clinical, laboratory, radiographic, and histopathologic features of methotrexate-associated lung injury in patients with rheumatoid arthritis: a multicenter study with literature review. *Arthritis Rheum* 1997;40:1829-37.
- 127 Bongartz T, Nannini C, Medina-Velasquez YF, et al. Incidence and mortality of interstitial lung disease in rheumatoid arthritis: a population-based study. *Arthritis Rheum* 2010;62:1583-91.
- 128 Demir R, Bodur H, Tokoglu F, et al. High resolution computed tomography of the lungs in patients with rheumatoid arthritis. *Rheumatol Int* 1999;19:19-22.
- 129 Gabbay E, Tarala R, Will R, et al. Interstitial lung disease in recent onset rheumatoid arthritis. *Am J Respir Crit Care Med* 1997;156:528-35.
- 130 Ascherman DP. Interstitial lung disease in rheumatoid arthritis. *Curr Rheumatol Rep* 2010;12:363-9.
- 131 Hadjinicolaou AV, Nisar MK, Parfrey H, et al. Non-infectious pulmonary toxicity of rituximab: a systematic review. *Rheumatology (Oxford)* 2012;51:653-62.
- 132 Kawashiri SY, Kawakami A, Sakamoto N, et al. A fatal case of acute exacerbation of interstitial lung disease in a patient with rheumatoid arthritis during treatment with tocilizumab. *Rheumatol Int* 2012;32:4023-6.
- 133 Perez-Alvarez R, Perez-de-Lis M, Diaz-Lagares C, et al. Interstitial lung disease induced or exacerbated by TNF-targeted therapies: analysis of 122 cases. *Semin Arthritis Rheum* 2011;41:256-64.
- 134 Mohr M, Jacobi AM. Interstitial lung disease in rheumatoid arthritis: response to IL-6R blockade. *Scand J Rheumatol* 2011;40:400-1.
- 135 Vassallo R, Matteson E, Thomas CF Jr. Clinical response of rheumatoid arthritis associated pulmonary fibrosis to tumor necrosis factor-alpha inhibition. *Chest* 2002;122:1093-6.
- 136 Herrinton LJ, Harrold LR, Liu L, et al. Association between anti-TNF-alpha therapy and interstitial lung disease. *Pharmacoevidiol Drug Saf* 2013;22:394-402.
- 137 Roubille C, Haraoui B. Interstitial lung diseases induced or exacerbated by DMARDs and biologic agents in rheumatoid arthritis: a systematic literature review. *Semin Arthritis Rheum* 2014;43:613-26.
- 138 Dixon WG, Hyrich KL, Watson KD, et al. Influence of anti-TNF therapy on mortality in patients with rheumatoid arthritis-associated interstitial lung disease: results from the British Society for Rheumatology Biologics Register. *Ann Rheum Dis* 2010;69:1086-91.
- 139 Matera MG, Calzetta L, Cazzola M. TNF-alpha inhibitors in asthma and COPD: we must not throw the baby out with the bath water. *Pulm Pharmacol Ther* 2010;23:121-8.
- 140 Paolisso G, Valentini G, Giugliano D, et al. Evidence for peripheral impaired glucose handling in patients with connective tissue diseases. *Metabolism* 1991;40:902-7.
- 141 Nagai K, Fukushima T, Oike H, et al. High glucose increases the expression of proinflammatory cytokines and secretion of TNFalpha and beta-hexosaminidase in human mast cells. *Eur J Pharmacol* 2012;687:39-45.
- 142 Pescovitz MD, Greenbaum CJ, Bundy B, et al. B-lymphocyte depletion with rituximab and beta-cell function: two-year results. *Diabetes Care* 2014;37:453-9.
- 143 Orban T, Beam CA, Xu P, et al. Reduction in CD4 central memory T-cell subset in costimulation modulator abatacept-treated patients with recent-onset type 1 diabetes is associated with slower C-peptide decline. *Diabetes* 2014;63:3449-57.
- 144 Senel S, Kisacik B, Ugan Y, et al. The efficacy and safety of etanercept in patients with rheumatoid arthritis and spondyloarthritis on hemodialysis. *Clin Rheumatol* 2011;30:1369-72.
- 145 Krause ML, Amin S, Makol A. Use of DMARDs and biologics during pregnancy and lactation in rheumatoid arthritis: what the rheumatologist needs to know. *Ther Adv Musculoskelet Dis* 2014;6:169-84.
- 146 Barrett JH, Brennan P, Fiddler M, et al. Does rheumatoid arthritis remit during pregnancy and relapse postpartum? Results from a nationwide study in the United Kingdom performed prospectively from late pregnancy. *Arthritis Rheum* 1999;42:1219-27.
- 147 Chakravarty EF, Sanchez-Yamamoto D, Bush TM. The use of disease modifying antirheumatic drugs in women with rheumatoid arthritis of childbearing age: a survey of practice patterns and pregnancy outcomes. *J Rheumatol* 2003;30:241-6.
- 148 Skomsvoll JF, Ostensen M, Irgens LM, et al. Obstetrical and neonatal outcome in pregnant patients with rheumatic disease. *Scand J Rheumatol Suppl* 1998;107:109-12.
- 149 Carter JD, Ladhani A, Ricca LR, et al. A safety assessment of tumor necrosis factor antagonists during pregnancy: a review of the Food and Drug Administration database. *J Rheumatol* 2009;36:635-41.
- 150 Hyrich KL, Verstappen SM. Biologic therapies and pregnancy: the story so far. *Rheumatology (Oxford)* 2014;53:1377-85.
- 151 Mahadevan U, Wolf DC, Dubinsky M, et al. Placental transfer of antitumor necrosis factor agents in pregnant patients with inflammatory bowel disease. *Clin Gastroenterol Hepatol* 2013;11:286-92; quiz e24.
- 152 Berthelsen BG, Fjeldsoe-Nielsen H, Nielsen CT, et al. Etanercept concentrations in maternal serum, umbilical cord serum, breast milk and child serum during breastfeeding. *Rheumatology (Oxford)* 2010;49:2225-7.
- 153 Gerhold K, Richter A, Schneider M, et al. Health-related quality of life in patients with long-standing rheumatoid arthritis in the era of biologics: data from the German biologics register RABBIT. *Rheumatology (Oxford)* 2015; published online 21 May.

BMJ takes no responsibility for the accuracy of the translation from the published English language original and is not liable for any errors that may occur.
